# Supplementary figures and images for: Transcriptomic Analysis Provides Insights into Grafting Union Development in Pecan (<em>Carya illinoinensis</em>)
Source: Preprints.org preprint supplement (doi:10.20944/preprints201712.0048.v1), 2017-12-07

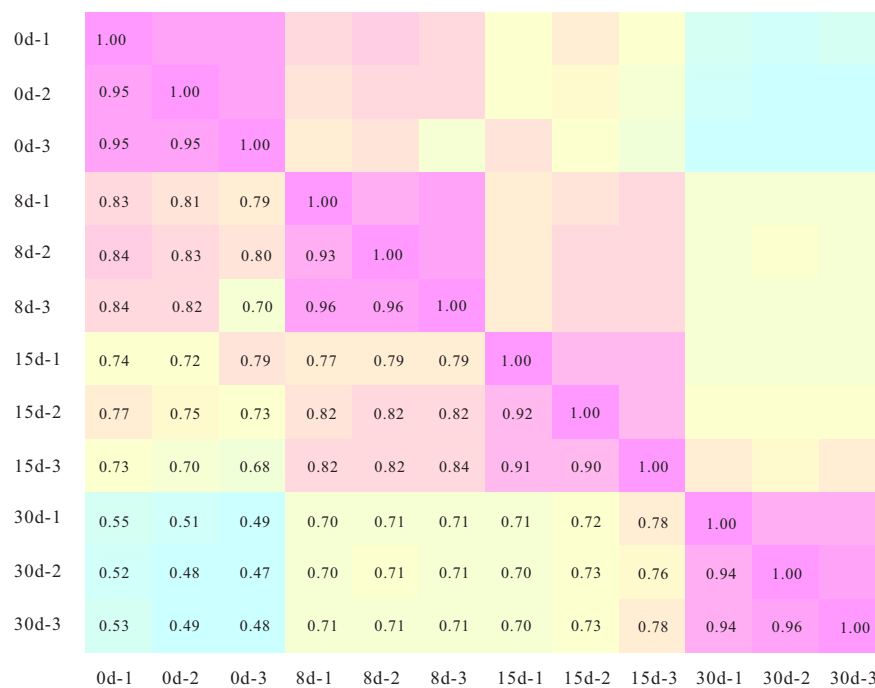

**Figure S2 Distribution of correlation co-efficiencies between each pair of samples**

Supplement: Supplementary file 1 [file supplementary]
